# Supplementary material for: Clusterization in head and neck squamous carcinomas based on lncRNA expression: molecular and clinical correlates
Source: PubMed Central journal article supplement (PMC5385094; doi:10.1186/s13148-017-0334-6), 2017-04-08

Figure S1

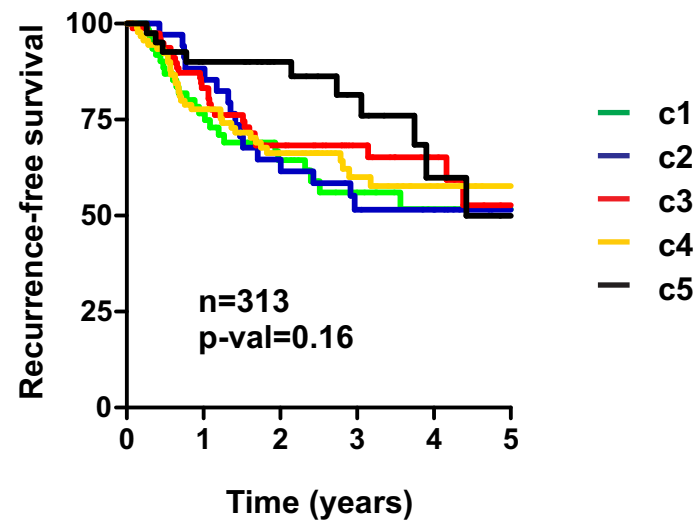

Supplement: 13148_2017_334_MOESM2_ESM.pdf [file 13148_2017_334_MOESM2_ESM.pdf]
